# Comparative genomics revealed drastic gene difference in two small Chinese perches, *Siniperca undulata* and *S. obscura*

Liang Lu,<sup>1,2,†</sup> Junlong Jiang,<sup>1,2,†</sup> Jinliang Zhao,<sup>3,4</sup> Chenhong Li <sup>1,2,\*</sup>

<sup>1</sup>Shanghai Universities Key Laboratory of Marine Animal Taxonomy and Evolution, Shanghai Ocean University, Shanghai 201306, China

<sup>2</sup>Engineering Research Center of Environmental DNA and Ecological Water Health Assessment, Shanghai Ocean University, Shanghai 201306, China

<sup>3</sup>Key Laboratory of Exploration and Utilization of Aquatic Genetic Resources, Ministry of Education, Shanghai Ocean University, Shanghai 201306, China

<sup>4</sup>Shanghai Collaborative Innovation for Aquatic Animal Genetics and Breeding, Shanghai Ocean University, Shanghai 201306, China

\*Corresponding author: 999 Huchenghuan Road, Pudong New District, Shanghai 201306, China. Email: chli@shou.edu.cn

†These authors contributed equally to this work.

## Abstract

*Siniperca undulata* and *S. obscura* (Centrarchiformes: Sinipercidae) are small Chinese perches, living in creeks and streams in southern China. While they have sympatric distribution and occupy similar macrohabitat, their body sizes and ecological niches have many differences. Determining the genome sequences of *S. undulata* and *S. obscura* would provide us an essential data set for better understanding their genetic makeup and differences that may play important roles in their adaptation to different niches. We determined the genome sequences of both *S. undulata* and *S. obscura* using 10x genomics technology and the next-generation sequencing. The assembled genomes of *S. undulata* and *S. obscura* were 744 and 733 Mb, respectively. Gene family analysis revealed that there were no overlap between *S. undulata* and *S. obscura* in terms of rapid expanding and rapid contracting genes families, which were related to growth, immunity, and mobility. Positive selection analyses also cooperated that the function of selected genes involve growth, athletic ability, and immunity, which may explain the preference of different niches by *S. undulata* and *S. obscura*. Pairwise sequentially Markovian coalescent analyses for the two species suggested that populations of both *S. undulata* and *S. obscura* showed a rising trend between 90 and 70 Ka probably due to the mild environment during the last interglacial period. A stage of population shrinking occurred from 70 to 20 Ka, which was in with the Tali glacial period in eastern China (57–16 Ka).

**Keywords:** Sinipercidae, genome assembly, positive selection, gene families, population history

## Introduction

*Siniperca undulata* and *S. obscura* are sister species belonging to the Centrarchiformes: Sinipercidae, which are freshwater carnivorous fishes endemic to China. They are closely related to the well-known North American sunfish (Centrarchidae) and has a very important role in the ecological health of streams and rivers in southern China.

*Siniperca undulata* and *S. obscura* are mainly distributed in rivers and lakes in plain areas below 300 m in elevation, and have sympatric distribution and occupy similar macrohabitat. *Siniperca undulata* is mainly distributed in the Oujiang River, tributaries south of the Yangtze River, parts of the Pearl River basin, and tributaries of the Qiantang River, whereas *S. obscura* is mainly distributed in tributaries south of the Yangtze River (Li 1991). The average body length of *S. undulata* is 10–15 cm, and the body shape is oblong with several yellow ripples on the side of the body. *Siniperca obscura* has a body length of 6–12 cm, a laterally flattened body form, and dark body color (Nichols 1943; Hwang et al. 1988).

Phenotypic differences between *S. undulata* and *S. obscura* may arise as they adapt to different ecological niches. *Siniperca undulata*

and *S. obscura* differ markedly in body size, which may be accompanied by differences in growth and metabolic rates (Brown et al. 2004), as well as having different effects on population size (White et al. 2007). Typically, larger body size species reproduce more slowly. In *S. undulata*, which are larger and have a minimum population doubling time <15 months, and *S. obscura*, which is smaller but has a minimum population doubling time in 1.4–4.4 years (Rainer et al. 2016). In addition, the yellow ripples on the side of the body of *S. undulata* may provide camouflage coloration for its activity in streams or shallower water layers, while the darker body coloration of *S. obscura* may provide its more benthic habits.

Current studies have paid less attention to *S. undulata* and *S. obscura*, with only a few phylogenetic studies, or studies for developing molecular markers (Chen et al. 2010; Song et al. 2017), which contain very limited genetic information, mostly focused on mitochondrial genome (Zhao et al. 2006). For Sinipercidae, recent studies have also focused on aquaculture, breeding, and immunization, less common on genomes of species with high economic value, such as *S. chuatsi*, *S. kneri*, and *S. scherzeri* (He et al.

Received: December 15, 2022. Accepted: April 18, 2023

© The Author(s) 2023. Published by Oxford University Press on behalf of The Genetics Society of America.

This is an Open Access article distributed under the terms of the Creative Commons Attribution License (<https://creativecommons.org/licenses/by/4.0/>), which permits unrestricted reuse, distribution, and reproduction in any medium, provided the original work is properly cited.

2020; Lu and Zhao 2020a). For *S. undulata* and *S. obscura*, genome-wide data have never been reported, which hampered us from understanding molecular pathway under phenotypic differences of these two species and their adaptive values to divergent ecological niches.

Here, we used 10x genomic technology to sequence and assemble whole genomes of *S. undulata* and *S. obscura* at low cost. This can provide fundamental data for comparative studies of Centrarchiformes, especially Sinipercaidae. We have further compared genomes of *S. undulata* and *S. obscura* to provide new insights into the genetic basis differences in growth, immunity, and motility. These genomes further complement the data base *Siniperca* research and offer new possibilities not only for in-depth studies of fish evolution and biological functions but also for providing additional genetic resources needed for breeding in this economically important taxon.

## Materials and methods

### Sample collection and extraction, amplification of genomic DNA

Both samples of the *S. undulata* and *S. obscura* were collected from Jingdezhen, Jiangxi Province of China in 2019 June 3 (Fig. 1). Muscle tissue was taken and then kept at  $-80^{\circ}\text{C}$ . DNA was extracted within 48 h using a modified CTAB protocol (Dellaporta et al. 1983).

To get high molecular weight DNA (HMW, DNA size greater than 50 kb) for 10x genomics library, the extracted DNA was processed with magnetic beads based on Monarch HMW DNA Extraction Kit: Tissue Protocol. The purified large fragments were kept in  $-20^{\circ}$ .

### Illumina Hiseq x Ten sequencing, denovo genome assembly and quality evaluation

DNA libraries for 10x genomics system were constructed using 0.18 ng of HMW DNA. The DNA were put in the microfluid to react with barcodes and the 8-bp primers. Subsequently, gel beads were broken and the primers for next generation sequencing were added to both ends of sequence. Finally, DNA sequencing was completed as PE150 on a half lane of an Illumina Hiseq x Ten run.

Supernova assembler v2.1.1 (Zheng et al. 2016) (RRID:SCR\_016756) was used to perform de novo genome assembly, initiated

under the “supernova run” module after getting the raw genome sequence. The maximum reads, namely -maxreads, was set as “all.” The parameter of “-localcores” and “localmen” were set as 50 and 1024 GB based on K-MER analysis and previous experience to get a better result for Supernova run. Other parameters were set as default. Benchmarking Universal Single-copy Orthologs (BUSCO) v3.0.1 (Manni et al. 2021) (BUSCO, RRID:SCR\_015008) and “vertebrate\_odb10” data set from OrthoDB were used to assess the completeness of assembled genomes. In this process, 3354 essential genes of vertebrate were evaluated.

### Gene predication and functional annotation

We filtered several repetitive scaffolds caused by Supernova assembler with a “rm\_dump\_by\_fa\_seq.py” script. Both filtered genomes of *S. undulata* and *S. obscura* were treated with RepeatModeler v1.0.11 (Smit and Hubley 2008) using default parameters to find the repetitive sequences. The potential repeated protein-coding sequences are included in the database constructed by RepeatModeler. Therefore, the repeated sequences in database were aligned to perciform genes using blast. Subsequently, hits were removed from the repeat sequence database for further analyses. Based on the results of RepeatModeler, RepeatMasker v4.0.7 (Smit and Hubley 2013–2015) (RepeatMasker, RRID: SCR\_012954) was used to mask the repetitive sequences in the genome.

All protein sequences of Percomorpha which are closely related to Sinipercaidae were downloaded in “Taxonomy-Protein” option from NCBI for gene prediction. In addition, we accessed the full-length transcriptome data of *S. chuatsi* from NCBI (BioProject number: PRJNA552987) in order to conduct gene prediction. Blastn v2.7.1 (BLASTN, RRID: SCR\_001598) was used to align the transcriptome to the genome (est2genome parameter in Maker). For more reliable alignments, blast hits were refined with Exonerate v2.2 (Slater and Birney 2005).

An iterative genome annotation was run for three times. Models used for gene prediction include de novo gene prediction, homology-based gene prediction and transcriptome-based prediction. In first run, Blastn v2.7.1 (BLASTN, RRID: SCR\_001598) was used to map the transcriptome to the genome (est2genome parameter in Maker). For preliminary prediction, blast hits were refined with Exonerate v2.2 (Slater and Birney 2005). After

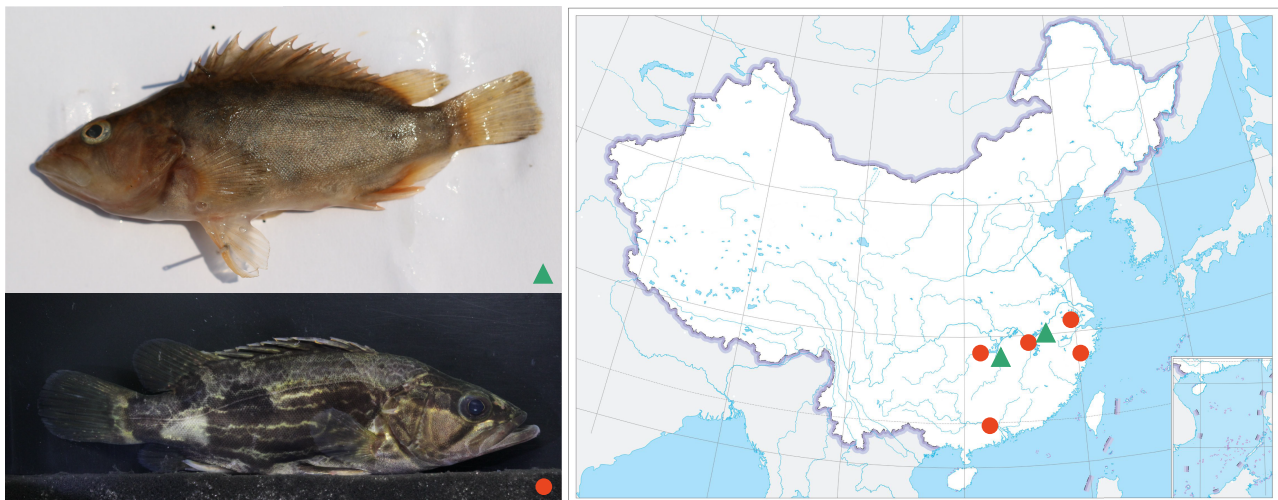

**Fig. 1.** Samples collected from Jingdezhen, Jiangxi Province of China. The dots and triangles in the map (right) show their distribution areas of *S. undulata* (bottom left) and *S. obscura* (top left), respectively.

alignment, MAKER v2.31.10 (Holt and Yandell 2011) (MAKER, RRID: SCR\_005309) pipeline was used to merge the results for the first run of gene prediction. In the second run, the results of homology-based gene prediction and transcriptome-based prediction from the first run was used to train the gene prediction HMM mode of Augustus v3.3 (Stanke and Waack 2003) (Augustus, RRID: SCR\_008417) base on *Danio rerio* (`-species = zebrafish`), and trained the SNAP (Korf 2004) HMM mode from scratch. The best gene model was chosen by MAKER subsequently. In third run, most parameters were set for the same as the second run, but “Re-annotation” option’s general feature format (GFF) file was used from the second run. To filter the predicted genes, we refined our data according to AED score (annotation edit distance). The gene with AED score <0.5 was retained. Well-annotated databases InterProScan5 (Jones et al. 2014) were applied to conduct the functional annotation. In this process, all the parameters were set as default and the mainstream databases including Pfam, GO in InterProScan5 were used for search. Finally, we uploaded the predicted genes to KAAS web server ([https://www.genome.jp/kaas-bin/kaas\\_main](https://www.genome.jp/kaas-bin/kaas_main)) in bi-directional mode blast alignment for KEGG pathway annotation.

In addition, transposable sequences were annotated using LTR\_harvest (Ellinghaus et al. 2008), LTR\_Finder (Xu and Wang 2007), and LTR\_retriever (Ou and Jiang 2018). The majority of RNA sequences were annotated using the cmscan program from infernal (Nawrocki and Eddy 2013). All annotated mRNAs were evaluated for noncoding RNA using ORF Length and GC content (LGC) (Wang et al. 2019).

## Gene family analysis

Protein data of 10 sibling species (*Collichthys lucidus*, *Nibeia albiflora*, *Micropterus salmoide*, *Epinephelus lanceolatus*, *Etheostoma cragini*, *Sander lucioperca*, *Dissostichus mawsoni*, *Trematomus bernacchii*, *Cyclopterus lumpus*, *Anarrhichthys ocellatus*) were downloaded from ensembl ([www.ensembl.org](http://www.ensembl.org)) to assess the annotated protein data of *S. undulata* and *S. obscura*. All 12 species were aligned with all-by-all blast. For blastp, “-seg” was set to filter the low complexity sequence. The sequences were clustered using Markov cluster algorithm (MCL) (Enright et al. 2002) with “-l 3” to determine the clustering granularity. The gene families that had a huge difference in copy number were trimmed.

OrthoFinder (Emms and Kelly 2019) was used to access the single-copy homologous genes of 12 species for a further phylogenetic relationship. Subsequently, we generated relevant species trees using iqtree (Chernomor et al. 2016) based on maximum likelihood method. The divergence time of *S. obscura* and *M. salmoide* from timetree ([www.timetree.org](http://www.timetree.org)) was used to deduce the ultrametric trees with r8s (Sanderson 2003). Finally, the change of gene families of the 12 species were inferred using computational analysis of gene family evolution (CAFE) (De Bie et al. 2006) with the clustering results of MCL and the ultrametric trees. Venn diagrams were printed using jvenn (Bardou et al. 2014) and Evolview (Subramanian et al. 2019) to demonstrate the rapid change of gene families for both *S. undulata* and *S. obscura*.

## Positive selection analysis

Phylogenetic analysis by maximum likelihood (PAML) was applied to test positive selection in genes of *S. undulata* and *S. obscura*. The longest isoform for all protein sequence and corresponding nucleotide sequence of both *S. undulata* and *S. obscura* from MAKER, and the 10 other species from Ensembl were obtained. Single-copy orthologous genes were found using OrthoFinder. Mafft was applied to complete the alignment of the peptide orthogroups. All the

coding sequences (CDS) were taken out and collected in a single file. The coding sequences were parsed to the peptide orthogroups by a custom script “get\_same\_name\_seq\_from\_fasta.py” as the primary file for PAML. Subsequently, we removed the stop codons and end gaps in the CDS file. Seq ID in this file was also converted to respective species’ name in order to distinguish each other clearly. We reverse-translated peptide alignment into nucleotide sequence using trimAl. The end gaps within the nucleotide sequence were removed and the format of files was converted to phylip format for PAML analysis, with the phylogenetic tree generated above using single-copy homologous genes.

Detecting significance using chi2 Program included in PAML for selected orthogroups. Moreover, gene ontology (GO) and KEGG ID of positive selected gene were extracted. Based on selected genes, an enrichment analysis and a related graph were done with TBtools (Chen et al. 2020) on the background of all genes.

## Population history analysis

Pairwise sequentially Markovian coalescent (PSMC) analysis (Li and Durbin 2011) was carried out to get information about population history of both *S. undulata* and *S. obscura*. The 50x fastq data were mapped to the assembled genome of *S. undulata* and *S. obscura*, respectively, with the “BWA-MEM” algorithm from bwa v0.7.17 (Li 2013). SAMtools v0.1.19 (Li et al. 2009) was used to generate the diploid consensus with default settings, except for “-d 26 -D 160.” The default settings of PSMC were adopted except a generation time and a substitution rate of *Siniperca* were set as 2.5 years and  $2.5 \times 10^{-8}$  per site per year, respectively. The generation data was obtained from FishBase (Rainer et al. 2016). We chose the substitution rate from the study of Ray-finned fish (Takezaki 2018).

## Results and discussion

### Sequencing result, de novo genome assembly and evaluation

We obtained 586.99 million paired-end reads for *S. undulata* (88.1 Gbp data) and 625.09 million paired-end reads for *S. obscura* (93.8 Gbp data) after trimming low-quality reads. A 74.51 and 77.73% of nucleotides had a quality score greater than 30 in *S. undulata* and *S. obscura*, respectively, indicating reliable sequence data.

The average length of HMW DNA of *S. undulata* and *S. obscura* used for the construction of microfluidic partitioned DNA library were 43.28 and 34.43 kb, respectively. N50 read numbers of each barcode were 672 in *S. undulata* and 4020 in *S. obscura*. Average insertion sizes were 412 bp in *S. undulata* and 397 bp in *S. obscura*. Average distance between SNPs were 1050 bp in *S. undulata* and 406 bp in *S. obscura*.

The de novo genome assembly of *S. undulata* and *S. obscura* were processed with 88.1 G and 93.8 G of sequencing data, respectively. The final genome size of *S. undulata* and *S. obscura* were 744 and 733 Mb. From the genome assembly, we gained a total of 13,658 scaffolds in *S. undulata* and 16,412 in *S. obscura*. For *S. undulata*, 216 scaffolds were larger than 1 Mb, accounting for 58.17% of the whole genome. For *S. obscura*, 188 scaffolds were larger than 1 Mb, accounting for 75.61% of the whole genome. The contig N50 of the genome of *S. undulata* and *S. obscura* were 45.6 and 36.56 kb, respectively; the scaffold N50 were 1.34 and 2.75 Mb, respectively. The longest scaffolds of *S. undulata* and *S. obscura* were 8.37 and 11.44 Mb. G and C deoxyribonucleic acid content of the genomes were 40.36 and 40.34% (Table 1).

BUSCO v3.0.1 (BUSCO, RRID:SCR\_015008) were processed for genome integrity assessment, using 3353 genes of vertebrates. For *S. undulata*, 3141 genes (93.7%) were completely matched in

**Table 1.** Statistics of the genome assemblies of *Siniperca undulata* and *S. obscura*.

| Metric                     | <i>S. obscura</i> | <i>S. undulata</i> |
|----------------------------|-------------------|--------------------|
| Assembly size (Mb)         | 733               | 744                |
| Scaffolds count            | 16,412            | 13,458             |
| Scaffolds count (>=1 Mb)   | 188               | 216                |
| >=1 Mb scaffolds ratio (%) | 75.61             | 58.71              |
| Max length scaffold (Mb)   | 11.44             | 8.37               |
| Scaffold N50 (Mb)          | 2.75              | 1.34               |
| Contig N50 (kb)            | 36.56             | 45.6               |
| GC (%)                     | 40.34             | 40.36              |
| BUSCO (%)                  | 93.1              | 93.7               |

**Table 2.** Annotation using InterProScan.

| Metric                | <i>S. obscura</i> | <i>S. undulata</i> |
|-----------------------|-------------------|--------------------|
| Gene number           | 24,360            | 24,358             |
| Annotated gene number | 22,818            | 23,344             |
| Annotation ratio      | 93.6%             | 95.8%              |
| GO                    | 16,373/67.2%      | 16,562/67.9%       |
| SuperFamily           | 16,158/66.3%      | 16,281/66.8%       |
| Pfam                  | 19,692/80.8%      | 19,544/80.2%       |
| ProSiteProfiles       | 12,085/49.6%      | 12,008/49.2%       |
| SMART                 | 11,005/45.1%      | 10,934/44.8%       |
| Gene3D                | 17,322/71.1%      | 17,431/71.5%       |
| PANTHER               | 21,409/87.8%      | 21,743/89.2%       |
| Coils                 | 5,317/21.8%       | 5,525/22.6%        |
| PRINTS                | 5,686/23.3%       | 5,408/22.2%        |
| CDD                   | 8,791/36%         | 8,621/35.5%        |
| ProSitePatterns       | 6,203/25.4%       | 5,943/24.3%        |
| PIRSF                 | 1,313/5.38%       | 1,105/4.53%        |

the assembled genome, containing 3119 (93.0%) single-copy genes and 22 (0.7%) multicopy genes. In addition, 140 (4.2%) genes were fragmented and 73 (2.1%) were not found. For *S. obscura*, 3121 genes (93.1%) were completely matched in the assembled genome, containing 3092 (92.2%) single-copy genes and 29 (0.9%) multicopy genes. One hundred and fifty (4.5%) genes were fragmented and 83 (2.4%) were not found. The final results indicate that most BUSCO genes were fully assembled in the genome of both *S. undulata* and *S. obscura*. This result showed our genomes contiguity is low, but gene completeness is good. This quality meets the needs of our analysis.

### Gene prediction and functional annotation

There were 24,358 genes predicted for *S. undulata*, and 24,360 genes predicted for *S. obscura* (Supplementary Material). The existing databases, including KEGG and InterProScan5, were used to evaluate the predicted coding genes, indicating that 95.8 and 93.6% of the genes had at least one hit in *S. undulata* and *S. obscura*, respectively. The results of blast on several databases are shown in Table 2.

We found the *S. obscura* genome contains a total of 26.5% repeat sequences, of which classified DNA transposons account for 8.23% of the genome, while the *S. undulata* genome contains a total of 27.41% repeat sequences, of which classified DNA transposons account for 8.70% of the genome. All repeat database in Supplementary Material. In addition, data such as tRNA and ncRNA obtained using Infernal and LGC also available in Supplementary Material.

### Gene family analysis

The results of gene family analysis in *S. undulata* and *S. obscura* are shown in Fig. 2. For *S. undulata*, there were 88 rapidly evolving gene

families, 1616 expanding gene families, and 1392 contracting gene families. For *S. obscura* were 59, 1200, and 1423, respectively. More gene families contracted and less gene families expanded in *S. obscura* compared with *S. undulata*. *Siniperca undulata* has a wider geographic distribution than *S. obscura*. *Siniperca undulata* has adapted to a variety of environments, indicating that they may face stronger selective pressure than *S. obscura* did, which led to more expansion of gene families in *S. undulata*. And *S. obscura* have more gene family contractions, may suffer more purifying selections. In addition, the Venn diagrams have no overlap between any rapidly expanding or contracting gene families in *S. undulata* and *S. obscura* (Fig. 2).

Search genes function for rapidly gene families result, we found that gene families related to metabolism, growth rate, motility, and immunity evolving rapidly in *S. undulata* and *S. obscura*. Among them, metabolism-related gene families expanded in *S. obscura* and contracted in *S. undulata*. Growth rate-related gene families expanded in *S. undulata* and contracted in *S. obscura*. Motility-related gene families expanded in *S. undulata* and contracted in *S. obscura*. For immunity, some expanded in *S. obscura* and contracted in *S. undulata*, and others expanded in *S. undulata* and contracted in *S. obscura*.

### Positive selection analysis

Search genes function for most significant PAML analysis result showed that genes related to growth, athletic ability and immunity were positively selected in both *S. undulata* and *S. obscura*. In *S. undulata*, positive selected genes were associated with growth and locomotion. This result was cooperated by the gene family analysis. In addition, some positive selection genes in *S. undulata* are associated with cancer formation.

We performed GO enrichment analysis and KEGG enrichment analysis using all positive selection genes. In GO term, phosphorus-oxygen lyase activity was enriched in both *S. obscura* and *S. undulata*. Phosphorus-oxygen lyase enzymes catalyze the cleavage of a phosphorus-oxygen bond, which can release large quantities energy in organisms. cGMP biosynthetic process was enriched in *S. obscura* and *S. undulata* as biological process, which is involved in the formation of cyclic GMP. Other enriched molecular functions and biological processes of *S. obscura* and *S. undulata* are shown in Fig. 3. In KEGG pathway, purine metabolism was enriched in *S. obscura* and *S. undulata*, which maintains cellular pools of adenylate and guanylate via synthesis and degradation of purine nucleotides (Yin et al. 2018). Autoimmune thyroid disease was enriched in *S. undulata*, which is a pathway related to an autoimmune disorder affecting the thyroid gland. Cytochrome P450 was enriched in *S. obscura*, which is important for xenobiotic metabolism and steroid transformation (Munro et al. 2018). All results are included in the Supplementary Material.

### Population history

The fluctuation of effective population size of *S. undulata* and *S. obscura* is shown in Fig. 4. From 4 to 2 Ma, the population size of both *S. undulata* and *S. obscura* was declining; among which the downward trend of *S. undulata* was more significant. This phenomenon may be attributed to the Quaternary glaciation among which the global temperature dropped rapidly and the world entered an ice age, leading to the decline of the two species. The population size of *S. obscura* started rising from 2 Ma, probably adapted to environmental changes rapidly due to their smaller body size. Compared with *S. obscura*, *S. undulata* is larger indicating a higher energy demands.

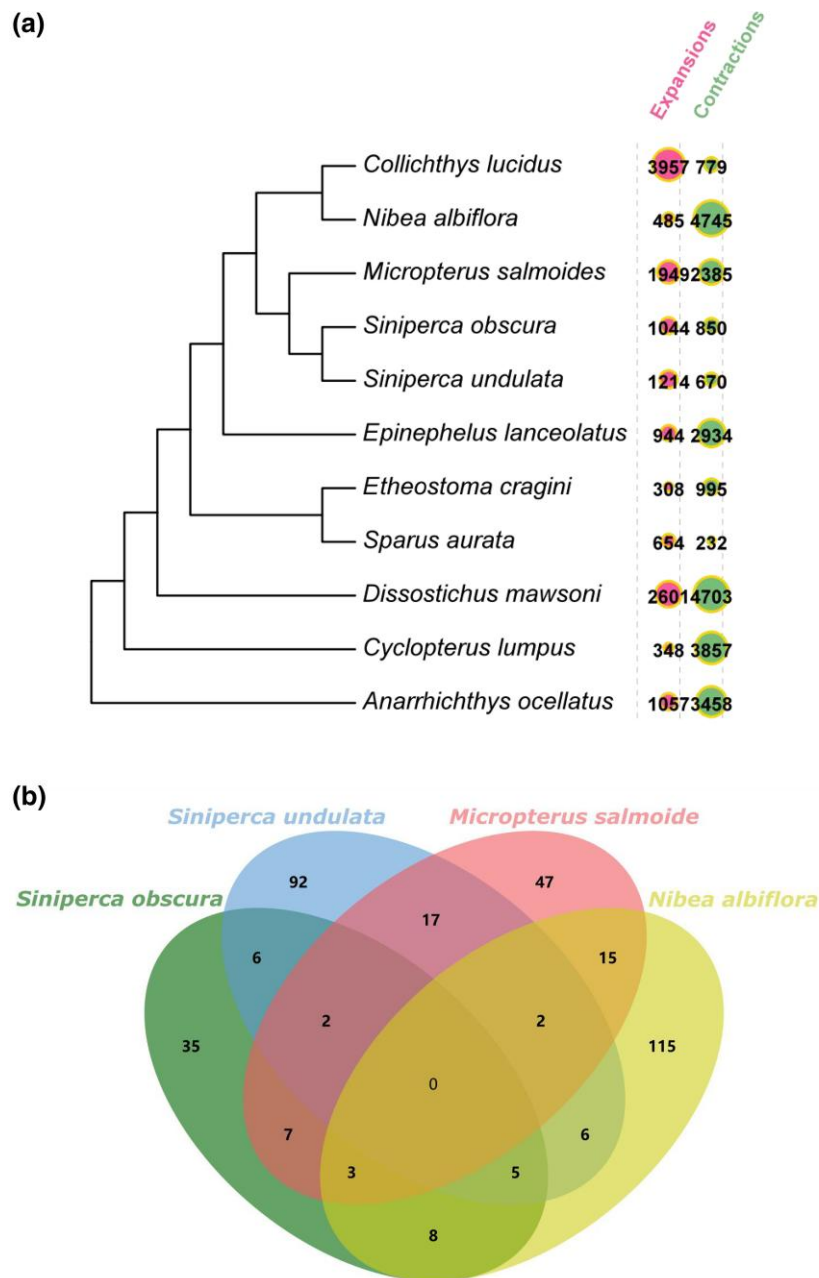

**Fig. 2.** a) Tree for all species with labeling of expansion, contraction, rapidly evolve gene families. b) A Venn diagram of rapidly evolving gene families for *Siniperca undulata*, *S. obscura*, *Micropterus salmoide*, and *Nibeia albiflora*.

Between 90 and 70 Ka, the population sizes of both *S. undulata* and *S. obscura* showed a rising trend, which may be caused by the extension of the last interglacial period (Cui et al. 2011), the warmest period since 1.5 Ma. After this phase, a descent phase began from 70 to 20 Ka, which is in accordance with the Tali glacial period in eastern China (57–16 Ka) (Wan et al. 2011). Due to the lack of specific mutation rate data for this species, our estimates may contain errors. However, the PSMC algorithm mentioned in the article is relatively accurate for the time period mentioned, previous PSMC analysis results for *S. knerii* (Lu and Zhao 2020a) with the geological history of China. In addition, the comparative analysis of the population history of these two species under the same parameters should be relatively reliable.

### Similarities and differences of selected genes

We found that several gene families related to growth expanded in *S. undulata* and contracted in *S. obscura*. In these gene families, we identified that the *dner*, *CDH10*, and *nrnx2b* genes were associated with growth. The *dner* gene mainly regulates the expression of epidermal growth factor (Wouters et al. 2005). The *CDH10* gene is important for proliferation, differentiation, and migration (Alattia et al. 1999). The *nrnx2b* gene is essential for a series of biological processes in cell growth (Sasaki et al. 2004). Furthermore, many expanding gene families in *S. undulata* include *Tenm1* and *Vwdel* genes. The *Tenm1* gene can promote the generation of synapses among neural cells and connect neurons (Li et al. 2018), while the *Vwdel* gene regulates proliferation and differentiation of enamel epithelial cells in dental tissue (Iwata et al. 2022),

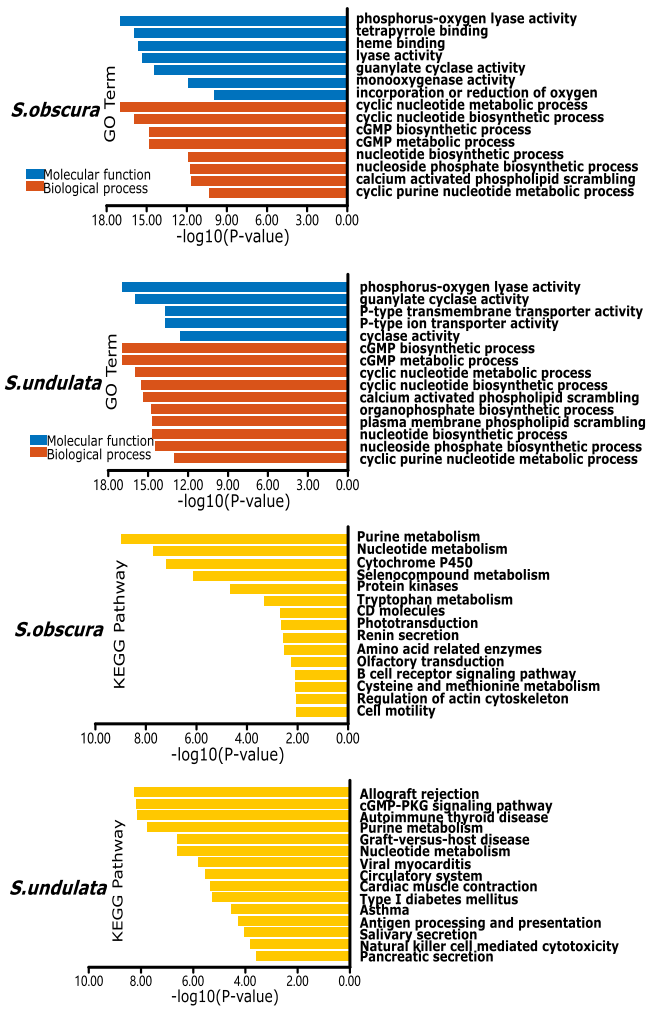

**Fig. 3.** Enrichment scores of GO terms and KEGG pathway in *Siniperca undulata* and *S. obscura*. The above two figures show the results of GO enrichment analysis for two species, and the following two figures show the results of KEGG enrichment analysis. The results show significant enrichment in phosphorus–oxygen lyase activity and purine metabolism for both species.

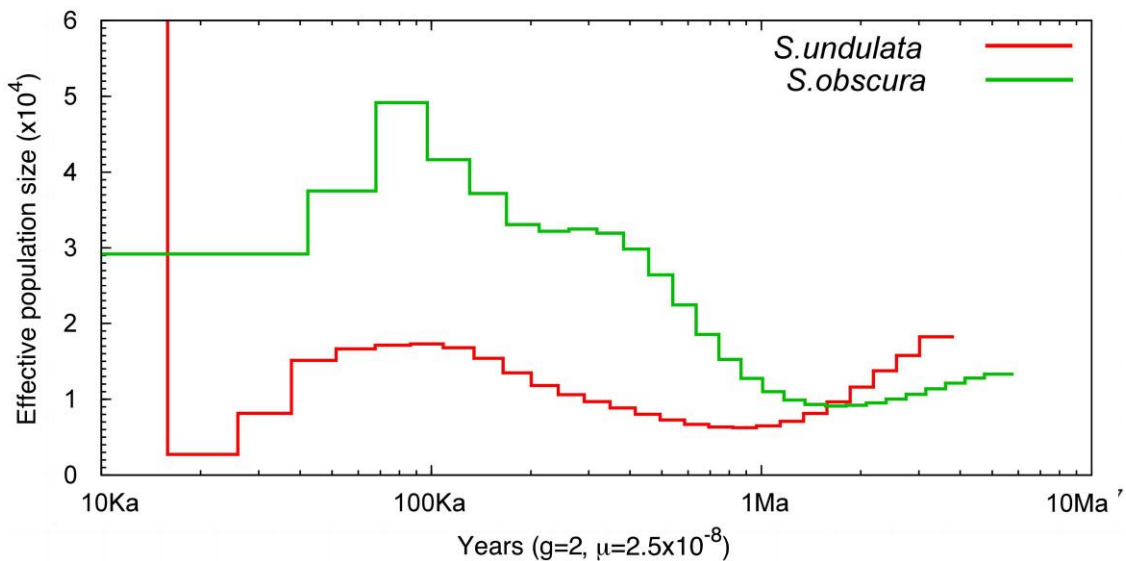

**Fig. 4.** PSMC analysis for *S. undulata* and *S. obscura* (10 Ma–10 Ka). This graph shows the population history of two species during the period from 10 Ma to 10 Ka. The x-axis is a logarithmic scale with markings from left to right corresponding to four historical time points: 10 Ka, 100 Ka, 1 Ma, and 10 Ma. The y-axis represents effective population size.

and its expression is associated with the regeneration of lambs and fins (Leigh et al. 2020). Additionally, the *rnf183* gene, which takes part in the regulation of the cell cycle and the promotion of terminal differentiation in the cell cycle (Lu et al. 2020b), and the *ltn1* gene, which plays an important role in the growth of the embryo (Yang et al. 2021), both positively selected in *S. undulata*. The positive selection genes in *S. undulata* corroborates our findings about the growth-related differences in the results of gene family analysis.

Several gene families related to athletics and metabolism show expansion in *S. obscura* but contraction in *S. undulata*. The *gbf1* gene-related gene family, which expands in *S. obscura*, regulates the expression of ADP-ribosylation factor (ARF) (Abergel et al. 1998). ARF is involved in material transportation and signal transduction (Muthamilarasan et al. 2016), leading to frequent material exchange and synthesis, which may indicate a faster metabolism rate in individuals. In addition, the exonuclease 3–5' domain containing 2 (*exd2*) gene participates in DNA double-strand break repair and functions as a ribonuclease for the regulation of mitochondrial translation (Park et al. 2019). The diaphanous-related formin 1 (*diaph1*) and diaphanous-related formin 3 (*diaph3*) genes are both linked to athletic ability, and they show expansion in *S. undulata* but contraction in *S. obscura*. The main function of DIAPH1 is to promote the combination of guanosine triphosphatase and actin, stabilize microtubules, and promote cell migration (Zaoui et al. 2010). DIAPH1 also induces the collection of actin to generate new filaments, facilitating muscle formation. Similar to *diaph1*, the *diaph3* gene can promote the reconstruction of the cytoskeleton and the formation of stress fibers (Tanaka 2000).

Different immune genes under selection in *S. obscura* and *S. undulata*. The *C1gtnf* gene, which is associated with immunity, expand in *S. obscura* and contract in *S. undulata*, which is involved in autoimmunity, cancer, and other pathological diseases (Kishore and Reid 2000). The *C1gtnf* gene also involves a tumor necrosis factor-like domain, whose main function is to inhibit the growth of tumor cells and strengthen the ability of anti-infection and individual immunity (Sessler et al. 2013). *Sema3fb* and *H2-L* genes are also related to immunity, expand in *S. undulata* and contract in *S. obscura*. The *Sema3fb* gene mainly regulates a series of immune globulin that have diverse functions, including antigen

binding, enhancing immunity, and resisting infection (Schroeder 2010). The H2-L gene regulates major histocompatibility complex class I chain-related molecules (MIC) in organisms. MIC mainly expresses in gastric epithelial cells, endothelial cells, and fibroblasts, activating the natural killer cell receptor (NKG2D), which takes part in the recognition of virus-infected cells and killing tumor cells (Collins 2004). Additionally, Sox5 and Sox8 genes take part in the immune response, positively selected in *S. undulata*. The expression of Sox5 may be highly related to the development of tumors, the size of focal infection, and lymphatic metastasis (Hock et al. 2007). Sox8 gene belongs to the SOX gene family, which takes part in the formation of tumors and cancer as a transcription factor (Castillo and Sanchez-Cespedes 2012). The Btb6b gene positively selected in *S. undulata* and not in *S. obscura*. This gene has a close relationship with Cul3. As a tumor suppressor gene, Cul3 encodes a protein named Cullin-3, which plays an important role in fighting against cancer (Canning et al. 2013).

### Adaptive evolution hypothesis for *S. undulata* and *S. obscura*

By comparing the differences in selected genes between *S. undulata* and *S. obscura*, we found that differences in growth, metabolism, vitality, and immunity reflect the differences in adaptive evolution between two species. Based on these results, we propose the following hypotheses.

Firstly, in terms of growth, development, and movement ability, in *S. undulata*, the expansion of gene families related to the dner and Vwdel genes may be associated with the golden wavy pattern on the skin of *S. undulata*. Gene families related to CDH10, nrxn2b, Tenm1, diaph1, and diaph3 are related to neural development, muscle development, and cell proliferation and differentiation, and these gene families have expansion in *S. undulata*, which may led to increase body size and activity ability.

Smaller species have a larger surface area, which leads to a faster exchange of material and energy with the surrounding environment. In *S. obscura*, the expansion of gene families related to the Gbf1 and exd2 genes has been observed, which are related to substance transport, signal transduction, and DNA repair. Combined with the small body size of *S. obscura*, this may be the result of its adaptation to a faster metabolic rate.

In terms of immunity, we found that the C1gtnf gene family had expansion in *S. obscura*. This gene has the main function of inhibiting tumor cell growth and enhancing immunity. However, in *S. undulata*, gene families related to Sema3fb and H2-L have expansion, while the Sox5, Sox8, and Btb6b genes have positive selection in *S. undulata*. These genes are not only related to antigen binding, resistance to infection, inhibition of cancer, and activation of natural killer cells but also involved in the formation of tumors. Based on these results, we speculate that there may be more carcinogenic and pathogenic factors in the habitat of *S. undulata*, leading to more relevant genes being under selection in this species.

### Data availability

The raw data are deposited in NCBI with SRA accessions numbers: SRR22544051-SRR22544058 for *S. undulata* and SRR22560318-SRR22560324 for *S. obscura*. The BioSample is available with accession number SAMN31858682 for *S. undulata* and SAMN31942353 for *S. obscura* at NCBI. Two assembled genomes are available at NCBI BioProject, PRJNA904940 for *S. undulata* and PRJNA906929 for *S. obscura*, and genomes also available in figshare <http://doi.org/10.6084/m9.figshare.21732578>. The *S. chuatsi* full-length transcriptome data were downloaded from NCBI and the BioProject number is

PRJNA552987. **Supplementary Material** and script, annotation data available at figshare: <http://doi.org/10.6084/m9.figshare.21709745> (for gene annotation), <http://doi.org/10.6084/m9.figshare.21709703> (for script), <https://doi.org/10.6084/m9.figshare.22494340> (for Repeat, LTR and RNA annotation) and <https://doi.org/10.6084/m9.figshare.21731762> (for GO & KEGG enrichment analysis result). **Supplemental material**.

### Funding

This work was supported by the earmarked fund for CARS (CARS-46), "Science and Technology Commission of Shanghai Municipality (19410740500)" and Asian Cooperation Fund Project (125A0607).

### Conflicts of interest

The author(s) declare no conflict of interest.

### Literature cited

- Abergel C, Chavrier P, Claverie JM. Triple association of CDC25-, Dbl- and Sec7-related domains in mammalian guanine-nucleotide-exchange factors. *Trends Biochem Sci.* 1998;23:472–473. doi:10.1016/S0968-0004(98)01283-3
- Alattia JR, Kurokawa H, Ikura M. Structural view of cadherin-mediated cell-cell adhesion. *Cell Mol Life Sci.* 1999;55:359–367. doi:10.1007/s000180050297
- Bardou P, Mariette J, Escudié F, Djemiel C, Klopp C. jvenn: an interactive Venn diagram viewer. *BMC Bioinformatics.* 2014;15:293. doi:10.1186/1471-2105-15-293
- Brown JH, Gillooly JF, Allen AP, Savage VM, West GB. Toward a metabolic theory of ecology. *Ecology.* 2004;85:1771–1789. doi:10.1890/03-9000
- Canning P, Cooper CDO, Krojer T, Murray JW, Pike ACW, Chaikwad A, Keates T, Thangaratnarajah C, Hojzan V, Marsden BD, et al. Structural basis for Cul3 protein assembly with the BTB-Kelch family of E3 ubiquitin ligases. *J Biol Chem.* 2013;288:7803–7814. doi:10.1074/jbc.M112.437996
- Castillo SD, Sanchez-Cespedes M. The sox family of genes in cancer development: biological relevance and opportunities for therapy. *Expert Opin Ther Targets.* 2012;16:903–919. doi:10.1517/14728222.2012.709239
- Chen C, Chen H, Zhang Y, Thomas HR, Frank MH, He Y, Xia R. TBtools: an integrative toolkit developed for interactive analyses of big biological data. *Mol Plant.* 2020;13:1194–1202. doi:10.1016/j.molp.2020.06.009
- Chen D, Guo X, Nie P. Phylogenetic studies of siniperid fish (Perciformes: Siniperidae) based on multiple genes, with first application of an immune-related gene, the virus-induced protein (viperin) gene. *Mol Phylogenet Evol.* 2010;55:1167–1176. doi:10.1016/j.ympev.2010.01.039
- Chernomor O, von Haeseler A, BQ M. Terrace aware data structure for phylogenomic inference from supermatrices. *Syst Biol.* 2016; 65:997–1008. doi:10.1093/sysbio/syw037
- Collins RWM. Human MHC class I chain related (MIC) genes: their biological function and relevance to disease and transplantation. *Eur J Immunogenet.* 2004;31:105–114. doi:10.1111/j.1365-2370.2004.00457.x
- Cui Z, Chen Y, Zhang W, Zhou S, Zhou L, Zhang M, Li C. Research history, glacial chronology and origins of quaternary glaciations in China. *Quat Sci.* 2011;31:749–764.

- De Bie T, Cristianini N, Demuth JP, Hahn MW. CAFE: a computational tool for the study of gene family evolution. *Bioinformatics*. 2006; 22:1269–1271. doi:10.1093/bioinformatics/btl097
- Dellaporta S, Wood J, Hicks J. A plant DNA miniprep: version II. *Mol Biol Rep*. 1983;1:18–21.
- Ellinghaus D, Kurtz S, Willhoeft U. LTRharvest, an efficient and flexible software for de novo detection of LTR retrotransposons. *BMC Bioinformatics*. 2008;9:18. doi:10.1186/1471-2105-9-18
- Emms D, Kelly S. Orthofinder: phylogenetic orthology inference for comparative genomics. *Genome Biol*. 2019;20:238. doi:10.1186/s13059-019-1832-y
- Enright AJ, Van Dongen S, Ouzounis CA. An efficient algorithm for large-scale detection of protein families. *Nucleic Acids Res*. 2002;30:1575–1584. doi:10.1093/nar/30.7.1575
- He S, Li L, Lv LY, Cai W, Dou Y, Li J, Tang S, Chen X, Zhang Z, Xu J, et al. Mandarin fish (*Siniperca*) genomes provide insights into innate predatory feeding. *Commun Biol*. 2020;3:361. doi:10.1038/s42003-020-1094-y
- Hock R, Furusawa T, Ueda T, Bustin M. Hmg chromosomal proteins in development and disease. *Trends Cell Biol*. 2007;17:72–79. doi:10.1016/j.tcb.2006.12.001
- Holt C, Yandell M. Maker2: an annotation pipeline and genome-database management tool for second-generation genome projects. *BMC Bioinformatics*. 2011;12:491. doi:10.1186/1471-2105-12-491
- Hwang H, Chen I, Yueh P. The freshwater fishes of China in colored illustrations. Vol. 2. Shanghai Sciences and Technology Press; 1988. Hydrobiology, Academia Sinica and Shanghai Natural Museum.
- Iwata K, Kawarabayashi K, Yoshizaki K, Tian T, Saito K, Sugimoto A, Kurogouchi R, Yamada A, Yamamoto A, Kudo Y, et al. von Willebrand factor D and EGF domains regulate ameloblast differentiation and enamel formation. *J Cell Physiol*. 2022;237:1964–1979. doi:10.1002/jcp.30667
- Jones P, Binns D, Chang HY, Fraser M, Li W, McAnulla C, McWilliam H, Maslen J, Mitchell A, Nuka G, et al. Interproscan 5: genome-scale protein function classification. *Bioinformatics*. 2014;30:1236–1240. doi:10.1093/bioinformatics/btu031
- Kishore U, Reid KB. C1q: structure, function, and receptors. *Immunopharmacology*. 2000;49:159–170. doi:10.1016/S0162-3109(00)80301-X
- Korf I. Gene finding in novel genomes. *BMC Bioinformatics*. 2004;5:59. doi:10.1186/1471-2105-5-59
- Leigh ND, Sessa S, Dragalzew AC, Payzin-Dogru D, Sousa J, Aggouras A, Johnson K, Dunlap G, Haas B, Levin M, et al. von Willebrand factor D and EGF domains is an evolutionarily conserved and required feature of blastemas capable of multitissue appendage regeneration. *Evol Dev*. 2020;22:297–311. doi:10.1111/ede.12332
- Li S. A study on the geographical distribution of the subfamily siniperca. *Chin J Zool*. 1991;26:40–44.
- Li H. Aligning sequence reads, clone sequences and assembly contigs with BWA-MEM. arXiv:1303.3997. 2013.
- Li H, Durbin R. Inference of human population history from individual whole-genome sequences. *Nature*. 2011;475:493–496. doi:10.1038/nature10231
- Li H, Handsaker B, Wysoker A, Fennell T, Ruan J, Homer N, Marth G, Abecasis G, Durbin R. The sequence alignment/map format and samtools. *Bioinformatics*. 2009;25:2078–2079. doi:10.1093/bioinformatics/btp352
- Li J, Shalev-Benami M, Sando R, Jiang X, Kibrom A, Wang J, Leon K, Katanski C, Nazarko O, Lu Y, et al. Structural basis for teneurin function in circuit-wiring: a toxin motif at the synapse. *Cell*. 2018;173:735–748.e15. doi:10.1016/j.cell.2018.03.036
- Lu S, Wang J, Chitsaz F, Derbyshire MK, Geer RC, Gonzales NR, Gwadz M, Hurwitz DI, Marchler GH, Song JS, et al. CDD/SPARCLE: the conserved domain database in 2020. *Nucleic Acids Res*. 2020b; 48:D265–D268. doi:10.1093/nar/gkz991
- Lu L, Zhao J, Li C. High-quality genome assembly and annotation of the big-eye mandarin fish (*Siniperca kneri*). *G3 (Bethesda)*. 2020a; 10:877–880. doi:10.1534/g3.119.400930
- Manni M, Berkeley M, Seppey M, Simão F, Zdobnov E. Busco update: novel and streamlined workflows along with broader and deeper phylogenetic coverage for scoring of eukaryotic, prokaryotic, and viral genomes. *Mol Biol Evol*. 2021;38:4647–4654. doi:10.1093/molbev/msab199
- Munro AW, McLean KJ, Grant JL, Makris TM. Structure and function of the cytochrome p450 peroxygenase enzymes. *Biochem Soc Trans*. 2018;46:183–196. doi:10.1042/BST20170218
- Muthamilarasan M, Mangu VR, Zandkarimi H, Prasad M, Baisakh N. Structure, organization and evolution of ADP-ribosylation factors in rice and foxtail millet, and their expression in rice. *Sci Rep*. 2016;6:24008. doi:10.1038/srep24008
- Nawrocki EP, Eddy SR. Infernal 1.1: 100-fold faster RNA homology searches. *Bioinformatics*. 2013;29:2933–2935. doi:10.1093/bioinformatics/btt509
- Nichols JT. The fresh-water fishes of China natural history of Central Asia. Vol. IX. New York: American Museum of Natural History; 1943.
- Ou S, Jiang N. LTR retriever: a highly accurate and sensitive program for identification of long terminal repeat retrotransposons. *Plant Physiol*. 2018;176:1410–1422. doi:10.1104/pp.17.01310
- Park J, Lee SY, Jeong H, Kang MG, Van Haute L, Minczuk M, Seo JK, Jun Y, Myung K, Rhee HW, et al. The structure of human EXD2 reveals a chimeric 3' to 5' exonuclease domain that discriminates substrates via metal coordination. *Nucleic Acids Res*. 2019;47:7078–7093. doi:10.1093/nar/gkz454
- Rainer F, Nazli D, Gianpaolo C, Kristin MK, Winker H. Estimating fisheries reference points from catch and resilience. *Fish Fish*. 2016; 18:506–526.
- Sanderson MJ. r8s: inferring absolute rates of molecular evolution and divergence times in the absence of a molecular clock. *Bioinformatics*. 2003;19:301–302. doi:10.1093/bioinformatics/19.2.301
- Sasaki T, Fässler R, Hohenester E. Laminin: the crux of basement membrane assembly. *J Cell Biol*. 2004;164:959–963. doi:10.1083/jcb.200401058
- Schroeder HW. Structure and function of immunoglobulins. *J Allergy Clin Immunol*. 2010;125:S41–S52. doi:10.1016/j.jaci.2009.09.046
- Sessler T, Healy S, Samali A, Szegezdi E. Structural determinants of disc function: new insights into death receptor-mediated apoptosis signalling. *Pharmacol Ther*. 2013;140:186–199. doi:10.1016/j.pharmthera.2013.06.009
- Slater GS, Birney E. Automated generation of heuristics for biological sequence comparison. *BMC Bioinformatics*. 2005;6:31. doi:10.1186/1471-2105-6-31
- Smit A, Hubley R. Repeatmodeler open-1.0. 2008. <http://www.repeatmasker.org>. Accessed date: Tuesday November 7, 2017
- Smit A, Hubley R. Repeatmasker open-4.0. 2013–2015. <http://www.repeatmasker.org>. Accessed date: Wednesday, February 1, 2017
- Song S, Zhao J, Li C. Species delimitation and phylogenetic reconstruction of the siniperca (perciformes: Siniperca) based on target enrichment of thousands of nuclear coding sequences. *Mol Phylogenet Evol*. 2017;111:44–55. doi:10.1016/j.ympev.2017.03.014
- Stanke M, Waack S. Gene prediction with a hidden Markov model and a new intron submodel. *Bioinformatics*. 2003;19(Suppl. 2): ii215–ii225. doi:10.1093/bioinformatics/btg1080
- Subramanian B, Gao S, Lercher MJ, Hu S, Chen WH. Evolview v3: a webserver for visualization, annotation, and management of phylogenetic trees. *Nucleic Acids Res*. 2019;47:W270–W275. doi:10.1093/nar/gkz357



- Takezaki N. Global rate variation in bony vertebrates. *Genome Biol Evol.* 2018;10:1803–1815. doi:10.1093/gbe/evy125
- Tanaka K. Formin family proteins in cytoskeletal control. *Biochem Biophys Res Commun.* 2000;267:479–481. doi:10.1006/bbrc.1999.1707
- Wan Y, Fu K, Liu Y, Shi Z. Geomorphologic structure, characteristics and processes in the cangshan mountains: explanations for the formation and development of the Dali Glaciation. *Int J Geosci.* 2011;2:155–163. doi:10.4236/ijg.2011.22016
- Wang G, Yin H, Li B, Yu C, Wang F, Xu X, Cao J, Bao Y, Wang L, Abbasi AA, et al. Characterization and identification of long non-coding RNAs based on feature relationship. *Bioinformatics.* 2019;35:2949–2956. doi:10.1093/bioinformatics/btz008
- White EP, Ernest SK, Kerkhoff AJ, Enquist BJ. Relationships between body size and abundance in ecology. *Trends Ecol Evol.* 2007;22:323–330. doi:10.1016/j.tree.2007.03.007
- Wouters MA, Rigoutsos I, Chu CK, Feng LL, Sparrow DB, Dunwoodie SL. Evolution of distinct EGF domains with specific functions. *Protein Sci.* 2005;14:1091–1103. doi:10.1110/ps.041207005
- Xu Z, Wang H. LTR\_FINDER: an efficient tool for the prediction of full-length LTR retrotransposons. *Nucleic Acids Res.* 2007;35:W265–W268. doi:10.1093/nar/gkm286
- Yang Q, Zhao J, Chen D, Wang Y. E3 ubiquitin ligases: styles, structures and functions. *Mol Biomed.* 2021;2:23. doi:10.1186/s43556-021-00043-2
- Yin J, Ren W, Huang X, Deng J, Li T, Yin Y. Potential mechanisms connecting purine metabolism and cancer therapy. *Front Immunol.* 2018;9:1697. doi:10.3389/fimmu.2018.01697
- Zaoui K, Benseddik K, Daou P, Salaün D, Badache A. ErbB2 receptor controls microtubule capture by recruiting ACF7 to the plasma membrane of migrating cells. *Proc Natl Acad Sci USA.* 2010;107:18517–18522. doi:10.1073/pnas.1000975107
- Zhao JL, Wang WW, Li SF, Cai WQ. Structure of the mitochondrial DNA control region of the sinipercine fishes and their phylogenetic relationship. *Yi Chuan Xue Bao.* 2006;33:793–799.
- Zheng GX, Lau BT, Schnall-Levin M, Jarosz M, Bell JM, Hindson CM, Kyriazopoulou-Panagiotopoulou S, Masquelier DA, Merrill L, Terry JM, et al. Haplotyping germline and cancer genomes with high-throughput linked-read sequencing. *Nat Biotechnol.* 2016;34:303–311. doi:10.1038/nbt.3432

Editor: A. Whitehead
